# Supplementary material for: Polycaprolactone-MXene coating for controlling initial biodegradation of magnesium implant via near-infrared light
Source: Royal Society of Chemistry journal article supplement (doi:10.1039/d4ra00799a), 2024-01-01
Supplement: d4ra00799a1.pdf [file d4ra00799a1.pdf]

## Supporting Information

### **Polycaprolactone-MXene coating for controlling initial biodegradation of magnesium implant by Near-Infrared Light**

Chen Ma,<sup>a</sup> Hao An,<sup>a</sup> Yu-Kyoung Kim,<sup>a</sup> Seo-Young Kim,<sup>a</sup> Yong-Seok Jang,<sup>\*a</sup> and Min-Ho Lee<sup>\*a</sup>

<sup>a</sup>Department of Dental Biomaterials, Institute of Biodegradable Materials, School of Dentistry, Jeonbuk National University, Jeon-Ju 54896, Republic of Korea

E-mail: Min-Ho Lee, [mh@jbnu.ac.kr](mailto:mh@jbnu.ac.kr)

# Contents

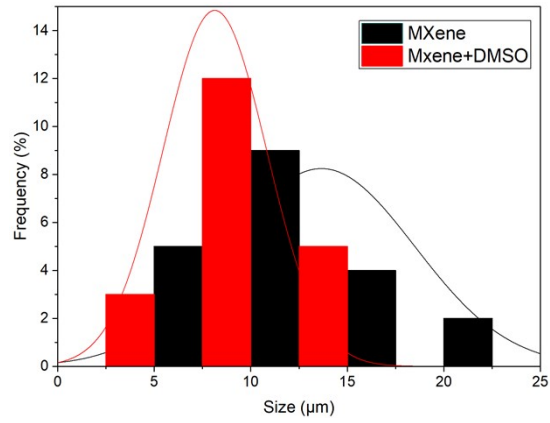

Figure S1. MXene particle size distribution by different synthesis methods.

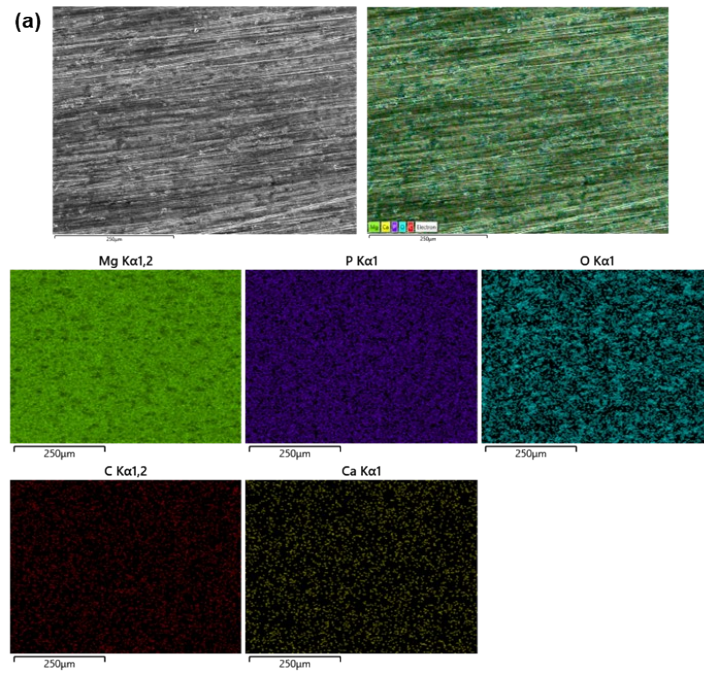

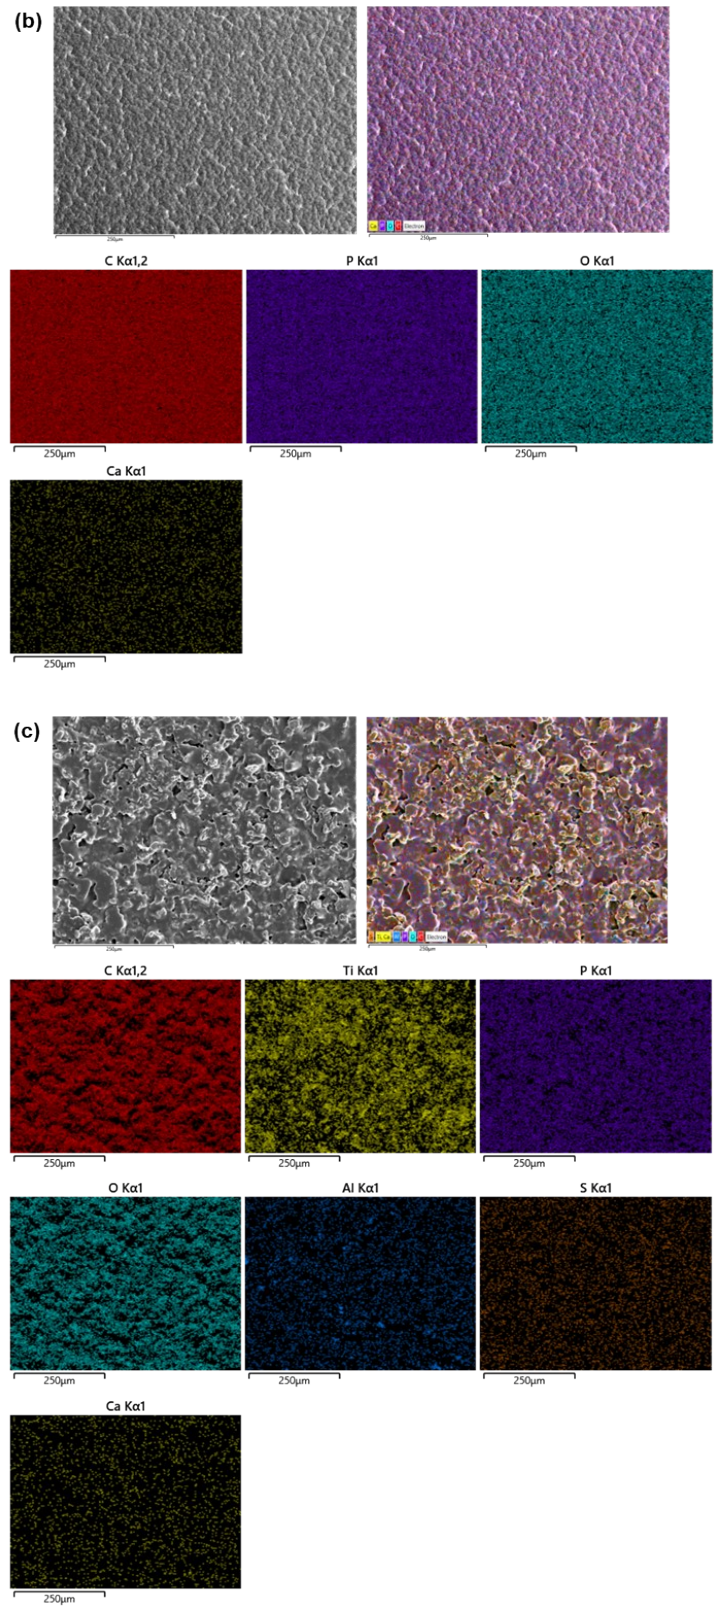

Figure S2. EDS map of Mg(a), PCL(b), and Mg/PCL-Mxene(c).

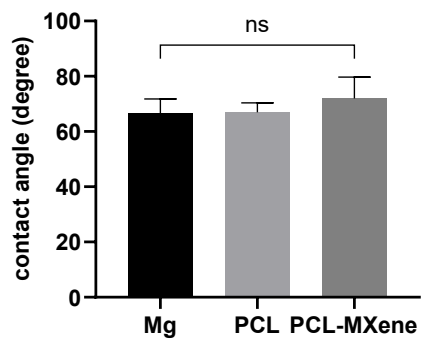

Figure S3. Contact angles of Mg, PCL, and PCL-MXene.

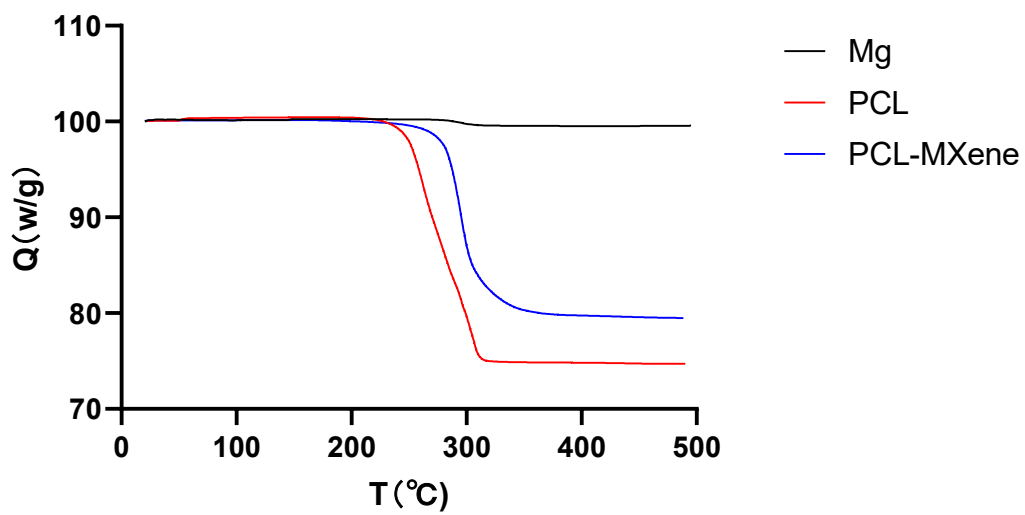

Figure S4. TGA curves of Mg, PCL, and PCL-MXene which recorded in the 10 °C to 120°C temperature range.
